# Supplementary material for: Influence of Ozone Treatment during Storage on Odour-Active Compounds, Total Titratable Acidity, and Ascorbic Acid in Oranges and Bananas
Source: MDPI journal article supplement (doi:10.3390/app131910885), 2023-09-30
Supplement: s1 [file s1]

**Table S1. Calibration lines of odorants**

| target compound                 | internal standard                                                                                        | quantifier ions ( <i>m/z</i> ) |          |                               |
|---------------------------------|----------------------------------------------------------------------------------------------------------|--------------------------------|----------|-------------------------------|
|                                 |                                                                                                          | analyte                        | standard | calibration line <sup>a</sup> |
| <i>Bananas</i>                  |                                                                                                          |                                |          |                               |
| ethyl butanoate                 | ethyl 2-( <sup>2</sup> H <sub>3</sub> )methylbutanoate                                                   | 88                             | 105      | y=9.6364x-0.0918              |
| ethyl 3-methylbutanoate         | ethyl 3-( <sup>2</sup> H <sub>3</sub> )methyl(2,2,3,4,4,4- <sup>2</sup> H <sub>6</sub> )butanoate        | 85                             | 94       | y=1.691x-0.0155               |
| pentan-2-yl acetate             | ethyl 2-( <sup>2</sup> H <sub>3</sub> )methylbutanoate                                                   | 87                             | 105      | y=1.9985x-0.1996              |
| 3-methylbutyl acetate           | 3-methylbutyl ( <sup>13</sup> C <sub>2</sub> )acetate                                                    | 61                             | 63       | y=1.1954x+0.1645              |
| 2-methylpropyl butanoate        | 3-methylbutyl ( <sup>13</sup> C <sub>2</sub> )acetate                                                    | 71                             | 63       | y=0.0725x-0.008               |
| 3-methylbutan-1-ol              | 3-( <sup>2</sup> H <sub>3</sub> )methyl(2,2,3,4,4,4- <sup>2</sup> H <sub>6</sub> )butan-1-ol             | 70                             | 77+78    | y=1.0685x+0.2159              |
| 3-methylbutyl butanoate         | ethyl 2-( <sup>2</sup> H <sub>3</sub> )methylbutanoate                                                   | 89                             | 105      | y=0.603x-0.2476               |
| 3-methylbutyl 3-methylbutanoate | ethyl 2-( <sup>2</sup> H <sub>3</sub> )methylbutanoate                                                   | 103                            | 105      | y=0.2668x-0.0967              |
| 3-methylbutyl 3-methylbutanoate | ethyl 3-( <sup>2</sup> H <sub>3</sub> )methyl(2,2,3,4,4,4- <sup>2</sup> H <sub>6</sub> )butanoate        | 103                            | 94       | y=0.2384x-0.1697              |
| <i>Oranges</i>                  |                                                                                                          |                                |          |                               |
| α-pinene                        | 7-( <sup>2</sup> H <sub>3</sub> )methyl-3-methylidene(8,8,8- <sup>2</sup> H <sub>3</sub> )octa-1,6-diene | 136                            | 141      | y=1.8844x-0.1078              |
| hexanal                         | (5,5,6,6- <sup>2</sup> H <sub>4</sub> )hexanal                                                           | 72                             | 76       | y=0.9538x-0.1245              |
| β-myrcene                       | 7-( <sup>2</sup> H <sub>3</sub> )methyl-3-methylidene(8,8,8- <sup>2</sup> H <sub>3</sub> )octa-1,6-diene | 136                            | 141      | y=1.6801x+0.0793              |
| limonene                        | 3-methylbutyl acetate                                                                                    | 136                            | 87       | y=0.1182x-0.0132              |
| α-terpineol                     | 3-( <sup>2</sup> H <sub>3</sub> )methyl-7-methyl-(4,4- <sup>2</sup> H <sub>2</sub> )octa-1,6-dien-3-ol   | 136                            | 141      | y=0.723x-0.3431               |
| carvone                         | 3-( <sup>2</sup> H <sub>3</sub> )methyl-7-methyl-(4,4- <sup>2</sup> H <sub>2</sub> )octa-1,6-dien-3-ol   | 150                            | 141      | y=3.7076x-1.377               |

<sup>a</sup>y = peak area standard / peak area analyte; x = amount standard (μg) / amount analyte (μg)

**Table S2. Growth and sporulation of *A. niger*, *P. digitatum*, and *P. expansum* on artificially contaminated bananas (upper panel) and oranges (lower panel) with and without ozone treatment (O<sub>3</sub>) over a course of 11 days in time.**

| Banana | <i>A. niger</i> |         | <i>P. digitatum</i> |         | <i>P. expansum</i> |         |
|--------|-----------------|---------|---------------------|---------|--------------------|---------|
|        | O <sub>3</sub>  | control | O <sub>3</sub>      | control | O <sub>3</sub>     | control |
| Day 1  | 0.0             | 0.0     | 0.0                 | 0.0     | 0.0                | 0.0     |
| Day 2  | 0.0             | 0.0     | 0.0                 | 0.0     | 0.0                | 0.0     |
| Day 3  | 0.0             | 0.0     | 0.0                 | 0.0     | 0.0                | 0.0     |
| Day 4  | 0.0             | 0.0     | 0.0                 | 0.0     | 0.0                | 0.17    |
| Day 7  | 0.0             | 0.0     | 0.0                 | 0.0     | 0.17               | 0.83    |
| Day 8  | 0.0             | 0.17    | 0.0                 | 0.0     | 1.00               | 0.83    |
| Day 9  | 0.0             | 0.33    | 0.0                 | 0.17    | 1.00               | 1.50    |
| Day 10 | 0.0             | 0.67    | 0.17                | 0.17    | 1.00               | 1.50    |
| Day 11 | 0.67            | 0.83    | 0.83                | 1.00    | 1.00               | 1.50    |

| Orange | <i>A. niger</i> |         | <i>P. digitatum</i> |         | <i>P. expansum</i> |         |
|--------|-----------------|---------|---------------------|---------|--------------------|---------|
|        | O <sub>3</sub>  | control | O <sub>3</sub>      | control | O <sub>3</sub>     | control |
| Day 1  | 0.0             | 0.0     | 0.0                 | 0.0     | 0.0                | 0.0     |
| Day 2  | 0.0             | 0.0     | 0.0                 | 0.0     | 0.0                | 0.0     |
| Day 3  | 0.0             | 0.0     | 0.0                 | 0.0     | 0.0                | 0.0     |
| Day 4  | 0.0             | 0.0     | 0.0                 | 0.0     | 0.0                | 0.0     |
| Day 7  | 0.0             | 0.0     | 0.0                 | 0.0     | 0.0                | 0.0     |
| Day 8  | 0.0             | 0.0     | 0.0                 | 0.0     | 0.0                | 0.0     |
| Day 9  | 0.0             | 0.0     | 0.0                 | 0.0     | 0.0                | 0.0     |
| Day 10 | 0.0             | 0.0     | 0.0                 | 0.0     | 0.0                | 0.0     |
| Day 11 | 0.50            | 0.50    | 0.50                | 0.50    | 0.50               | 1.00    |

**Legend to Table S2:** Each day the growth and sporulation of each mould was visually inspected, ranked, and scored. A score of 0 indicates no growth (white boxes), a score  $\leq 0.5$  indicates growth without sporulation (light green boxes), and  $\leq 1.5$  growth with sporulation (green boxes). A score of 1.5 (complete sporulation of the colony) is indicated in dark green. In the boxes average score values are provided. The experiment was independently repeated three times using three fruits each.

**Table S3. Concentrations of selected odorants in bananas during storage without (control) and with ozone treatment once or three times a day**

| Ozone treatment   | Sample     | 2-pentyl acetate | 3-methylbutyl acetate | 2-methylpropyl butanoate | 3-methyl-1-butanol | 3-methylbutyl butanoate | 3-methylbutyl 3-methylbutanoate | ethyl butanoate | ethyl 3-methylbutanoate |
|-------------------|------------|------------------|-----------------------|--------------------------|--------------------|-------------------------|---------------------------------|-----------------|-------------------------|
| Once a day        | Day0       | 163 ± 43 d       | 774 ± 492 e           | nd                       | 1016 ± 676 e       | nd                      | nd                              | 25 ± 6 e        | nd                      |
| Once a day        | Ozon Day2  | 2330 ± 208 a     | 15300 ± 6772 c        | 441 ± 184 b              | 6655 ± 3833 d      | 271 ± 129 a             | 6.06 ± 1.43 b                   | 270 ± 26 d      | nd                      |
| Once a day        | RT Day2    | 2307 ± 183 a     | 19900 ± 1443 cd       | 627 ± 278 a              | 9763 ± 3580 d      | 316 ± 210 a             | 15.4 ± 1.0 b                    | 292 ± 54 c      | nd                      |
| Once a day        | Ozon Day4  | 2534 ± 326 a     | 26367 ± 8135 ab       | 627 ± 372 a              | 13067 ± 2555 c     | 59 ± 23 a               | 2.88 ± 1.18 b                   | 1383 ± 345 b    | 65 ± 15 a               |
| Once a day        | RT Day4    | 2248 ± 158 a     | 27900 ± 1830 a        | 762 ± 289 a              | 12876 ± 2483 c     | 147 ± 78 a              | 5.26 ± 2.56 b                   | 1295 ± 505 b    | 56 ± 23 a               |
| Once a day        | Ozon Day7  | 1550 ± 435 b     | 17467 ± 3385 b        | 1477 ± 1050 a            | 27075 ± 8451 cd    | 360 ± 278 a             | 13.5 ± 0.8 b                    | 2120 ± 962 bc   | 135 ± 8 a               |
| Once a day        | RT Day7    | 1704 ± 121 b     | 26034 ± 2969 bc       | 871 ± 176 a              | 20080 ± 5582 de    | 257 ± 166 a             | 16.4 ± 5.2 b                    | 2538 ± 448 a    | 97 ± 17 a               |
| Once a day        | Ozon Day9  | 873 ± 35 c       | 17750 ± 1655 b        | 724 ± 56 a               | 80525 ± 13768 b    | 329 ± 87 a              | 30.0 ± 15.3 b                   | 3274 ± 299 ab   | 106 ± 8 a               |
| Once a day        | RT Day9    | 719 ± 100 c      | 14634 ± 1223 d        | 734 ± 327 a              | 43550 ± 11290 c    | 554 ± 182 a             | 34.1 ± 17.6 b                   | 2914 ± 994 de   | 90 ± 42 a               |
| Once a day        | Ozon Day11 | 661 ± 58 c       | 18234 ± 1557 a        | 1072 ± 306 a             | 87950 ± 41936 b    | 497 ± 58 a              | 470 ± 52 a                      | 3214 ± 1036 cd  | 146 ± 60 a              |
| Once a day        | RT Day11   | 547 ± 76 cd      | 14650 ± 3182 c        | 1193 ± 744 ab            | 159000 ± 25239 a   | 464 ± 101 a             | 401 ± 124 a                     | 4274 ± 2033 a   | 145 ± 67 a              |
| Three times a day | Day0       | 420 ± 38 f       | 326 ± 13 bc           | nd                       | nd                 | nd                      | nd                              | 1703 ± 194 e    | nd                      |
| Three times a day | Ozon Day2  | 1832 ± 1148 bcde | 3252 ± 3264 bc        | 144 ± 102 ab             | nd                 | nd                      | nd                              | 1984 ± 304 de   | nd                      |
| Three times a day | RT Day2    | 1278 ± 271 def   | 2002 ± 1352 bc        | 118 ± 63 b               | nd                 | nd                      | nd                              | 2106 ± 208 de   | nd                      |
| Three times a day | Ozon Day4  | 4124 ± 336 a     | 8473 ± 5748 bc        | 770 ± 514 ab             | 4728 ± 1043 bc     | nd                      | nd                              | 7966 ± 3039 abc | nd                      |
| Three times a day | RT Day4    | 3240 ± 120 ab    | 4541 ± 2482 bc        | 225 ± 27 ab              | 893 ± 477 c        | nd                      | nd                              | 10631 ± 3099 ab | nd                      |
| Three times a day | Ozon Day7  | 2284 ± 868 bcd   | 36744 ± 12492 bc      | 996 ± 658 ab             | 2124 ± 581 bc      | nd                      | nd                              | 8060 ± 1484 b   | nd                      |
| Three times a day | RT Day7    | 2555 ± 1301 abcd | 46229 ± 17680 ab      | 901 ± 264 ab             | 1892 ± 722 c       | nd                      | nd                              | 9777 ± 2066 ab  | nd                      |
| Three times a day | Ozon Day9  | 2603 ± 673 bc    | 68191 ± 47532 a       | 1430 ± 937 a             | 10860 ± 8354 ab    | nd                      | nd                              | 10338 ± 1815 ab | nd                      |
| Three times a day | RT Day9    | 2897 ± 660 ab    | 73511 ± 28263 a       | 1189 ± 623 ab            | 4667 ± 1675 bc     | nd                      | nd                              | 11230 ± 3212 a  | nd                      |
| Three times a day | Ozon Day11 | 1427 ± 306 cdef  | 42526 ± 9741 ab       | 1339 ± 583 ab            | 16702 ± 3199 a     | nd                      | nd                              | 4744 ± 686 cd   | nd                      |
| Three times a day | RT Day11   | 943 ± 137 ef     | 20504 ± 7458 bc       | 1245 ± 713 ab            | 11232 ± 4648 ab    | nd                      | nd                              | 3827 ± 471 de   | nd                      |

**Table S4. Concentrations of selected odorants in oranges during storage without (control) and with ozone treatment once or three times a day**

| Ozone treatment   | Sample     | hexanal      | beta-myrcene   | alpha-pinene | limonene       | alpha-terpineol | carvone     |
|-------------------|------------|--------------|----------------|--------------|----------------|-----------------|-------------|
| Once a day        | Day0       | 1030 ± 111 b | 261 ± 40 a     | 152 ± 50 ab  | 4420 ± 683 a   | 190 ± 52 a      | 199 ± 94 a  |
| Once a day        | Ozon Day2  | 720 ± 136 c  | 101 ± 74 bcd   | 102 ± 33 b   | 3180 ± 2931 a  | 97.4 ± 56 bc    | 168 ± 29 ab |
| Once a day        | RT Day2    | 691 ± 54 c   | 152 ± 41 abcd  | 176 ± 29 ab  | 5990 ± 1531 a  | 114 ± 21 abc    | 172 ± 16 ab |
| Once a day        | Ozon Day4  | 754 ± 27 c   | 241 ± 55 ab    | 234 ± 53 ab  | 5760 ± 1049 a  | 60.4 ± 7 bc     | 162 ± 5 ab  |
| Once a day        | RT Day4    | 736 ± 10 c   | 218 ± 3 abc    | 212 ± 20 ab  | 5930 ± 330 a   | 86.5 ± 18 bc    | 162 ± 15 ab |
| Once a day        | Ozon Day7  | 697 ± 24 c   | 74.9 ± 8 d     | 96.7 ± 34 b  | 2420 ± 299 a   | 40.8 ± 12 c     | 101 ± 17 b  |
| Once a day        | RT Day7    | 723 ± 11 c   | 160 ± 76 abcd  | 130 ± 72 ab  | 4150 ± 2686 a  | 52.6 ± 13 bc    | 137 ± 26 ab |
| Once a day        | Ozon Day9  | 881 ± 35 bc  | 116 ± 7 bcd    | 130 ± 52 b   | 4780 ± 1891 a  | 68.9 ± 6 bc     | 194 ± 9 ab  |
| Once a day        | RT Day9    | 865 ± 17 bc  | 76.4 ± 23 cd   | 109 ± 42 b   | 2310 ± 341 a   | 46.3 ± 4 bc     | 144 ± 10 ab |
| Once a day        | Ozon Day11 | 1380 ± 184 a | 154 ± 102 abcd | 283 ± 128 a  | 3370 ± 1399 a  | 98.5 ± 27 bc    | 222 ± 59 a  |
| Once a day        | RT Day11   | 1120 ± 85 b  | 204 ± 32 abcd  | 226 ± 67 ab  | 3980 ± 612 a   | 126 ± 5 ab      | 228 ± 31 a  |
| Three times a day | Day0       | 622 ± 92 a   | 738 ± 241 a    | 428 ± 128 a  | 4100 ± 565 ab  | 110 ± 20 d      | 256 ± 38 bc |
| Three times a day | Ozon Day2  | 696 ± 77 a   | 163 ± 32 bc    | 155 ± 43 bc  | 3910 ± 1207 ab | 156 ± 18 c      | 408 ± 19 a  |
| Three times a day | RT Day2    | 655 ± 20 a   | 380 ± 178 b    | 210 ± 34 b   | 5610 ± 1543 a  | 261 ± 38 a      | 427 ± 15 a  |
| Three times a day | Ozon Day4  | 630 ± 84 a   | 92.3 ± 21 c    | 83.1 ± 23 c  | 2287 ± 650 b   | 153 ± 21 c      | 412 ± 16 a  |
| Three times a day | RT Day4    | 672 ± 92 a   | 131 ± 44 bc    | 108 ± 27 bc  | 4190 ± 948 ab  | 213 ± 20 b      | 425 ± 10 a  |
| Three times a day | Ozon Day7  | 617 ± 50 a   | 285 ± 202 bc   | 116 ± 22 bc  | 3300 ± 560 ab  | 67.3 ± 20 e     | 161 ± 28 d  |
| Three times a day | RT Day7    | 685 ± 62 a   | 245 ± 201 bc   | 188 ± 107 bc | 3120 ± 2013 ab | 84.4 ± 41 de    | 239 ± 42 c  |
| Three times a day | Ozon Day9  | 629 ± 103 a  | 98.9 ± 47 c    | 94.4 ± 12 bc | 2980 ± 2150 ab | 62.0 ± 18 e     | 227 ± 16 c  |
| Three times a day | RT Day9    | 596 ± 120 a  | 157 ± 47 bc    | 138 ± 29 bc  | 5520 ± 1617 a  | 70.9 ± 11 de    | 300 ± 42 b  |
| Three times a day | Ozon Day11 | 677 ± 126 a  | 216 ± 101 bc   | 181 ± 46 bc  | 3420 ± 1182 ab | 49.7 ± 14 e     | 237 ± 42 c  |
| Three times a day | RT Day11   | 647 ± 84 a   | 172 ± 57 bc    | 136 ± 27 bc  | 3450 ± 802 ab  | 66.1 ± 10 e     | 241 ± 10 c  |

**Table S5. Total acid concentrations in the bananas and oranges during storage without (control) or with ozone treatment once and three times a day**

| Sample     | Total acid concentrations (g/L) |                        |                       |                        |
|------------|---------------------------------|------------------------|-----------------------|------------------------|
|            | Bananas                         |                        | Oranges               |                        |
|            | 1 ozonisation per day           | 3 ozonisations per day | 1 ozonisation per day | 3 ozonisations per day |
| Day0       | 5.07 ± 0.55 a                   | 3.99 ± 0.20 a          | 19.44 ± 1.38 ab       | 6.89 ± 0.94 a          |
| Ozon Day2  | 4.48 ± 0.11 ab                  | 4.74 ± 0.68 a          | 19.98 ± 1.37 a        | 5.75 ± 0.43 ab         |
| RT Day2    | 5.03 ± 0.19 a                   | 4.54 ± 0.27 a          | 18.79 ± 0.09 ab       | 6.18 ± 0.41 ab         |
| Ozon Day4  | 4.12 ± 0.33 bc                  | 4.64 ± 0.74 a          | 20.40 ± 2.51 a        | 5.50 ± 1.05 b          |
| RT Day4    | 3.69 ± 0.24 bcd                 | 4.96 ± 0.71 a          | 21.61 ± 0.11 a        | 6.02 ± 0.64 ab         |
| Ozon Day7  | 3.33 ± 0.11 de                  | 4.36 ± 0.81 a          | 18.44 ± 3.22 ab       | 5.86 ± 0.54 ab         |
| RT Day7    | 3.50 ± 0.24 cde                 | 4.23 ± 0.56 a          | 19.61 ± 0.25 ab       | 5.66 ± 0.55 ab         |
| Ozon Day9  | 3.86 ± 0.12 bcd                 | 3.61 ± 0.42 a          | 14.90 ± 1.82 b        | 5.88 ± 0.11 ab         |
| RT Day9    | 4.39 ± 0.65 abc                 | 4.61 ± 0.93 a          | 16.22 ± 0.45 ab       | 6.36 ± 0.38 ab         |
| Ozon Day11 | 2.81 ± 0.13 e                   | 3.61 ± 0.71 a          | 19.37 ± 2.23 ab       | 5.36 ± 0.31 b          |
| RT Day11   | 3.28 ± 0.13 de                  | 3.37 ± 0.47 a          | 17.59 ± 2.05 ab       | 5.54 ± 0.46 ab         |

**Table S6. Ascorbic acid concentrations in the bananas and oranges without (control) or with ozone treatment three times a day**

| Sample            | Ascorbic acid (mg / 100g) |                  |
|-------------------|---------------------------|------------------|
|                   | Bananas                   | Oranges          |
| <b>Day0</b>       | 10.89 ± 0.92 a            | 50.75 ± 5.52 ab  |
| <b>Ozon Day2</b>  | 9.69 ± 1.28 a             | 49.74 ± 5.64 abc |
| <b>RT Day2</b>    | 9.61 ± 2.16 a             | 49.2 ± 3.96 abc  |
| <b>Ozon Day4</b>  | 5.41 ± 1.19 bc            | 53.19 ± 2.71 a   |
| <b>RT Day4</b>    | 6.42 ± 0.56 bc            | 50.17 ± 0.99 ab  |
| <b>Ozon Day7</b>  | 4.16 ± 0.46 c             | 44.39 ± 5.37 bc  |
| <b>RT Day7</b>    | 4.49 ± 0.26 c             | 47.22 ± 2.87 abc |
| <b>Ozon Day9</b>  | 4.27 ± 0.14 c             | 49.23 ± 2 abc    |
| <b>RT Day9</b>    | 4.86 ± 0.61 bc            | 46.32 ± 3.76 abc |
| <b>Ozon Day11</b> | 4.70 ± 0.31 c             | 46.02 ± 4.09 abc |
| <b>RT Day11</b>   | 4.79 ± 0.44 c             | 43.46 ± 3.13 c   |
